# Supplementary material
Source: PubMed Central journal article supplement (PMC2668006)
Supplement: mmc1.pdf [file mmc1.pdf]

## Supplemental Data

### Diverse Genome-wide Association Studies Associate the IL12/IL23 Pathway with Crohn's Disease

Kai Wang, Haitao Zhang, Subra Kugathasan, Vito Annese, Jonathan P. Bradfield, Richard K. Russell, Patrick M A Sleiman, Marcin Imielinski, Joseph Glessner, Cuiping Hou, David C. Wilson, Thomas Walters, Cecilia Kim, Edward C. Frackelton, Paolo Lionetti, Arrigo Barabino, Johan Van Limbergen, Stephen Guthery, Lee Denson, David Piccoli, Mingyao Li, Marla Dubinsky, Mark Silverberg, Anne Griffiths, Struan F.A. Grant, Jack Satsangi, Robert Baldassano, and Hakon Hakonarson

**Table S1.** Most significant pathways (FDR<0.25) in the discovery cohort (WTCCC data set), with 25,000 permutations to estimate statistical significance. FDR: false discovery rate; FWER: family-wise error rate.

| Pathway identifier | Pathway source | Description                                | Set size | Z-score | P-value | FDR   | FWER    |
|--------------------|----------------|--------------------------------------------|----------|---------|---------|-------|---------|
| IL12Pathway        | BioCarta       | IL12 and Stat4 Dependent Signaling Pathway | 20       | 3.814   | 0.00008 | 0.045 | 0.03851 |
| tcrPathway         | BioCarta       | T Cell Receptor Signaling Pathway          | 41       | 3.562   | 0.00028 | 0.06  | 0.09827 |
| hsa04660           | KEGG           | T cell receptor signaling pathway          | 88       | 3.339   | 0.00072 | 0.089 | 0.20394 |
| hsa02010           | KEGG           | ABC transporters                           | 42       | 3.317   | 0.00028 | 0.071 | 0.21671 |
| GO0046982          | GO             | protein heterodimerization activity        | 126      | 3.315   | 0.0006  | 0.058 | 0.21815 |
| TPOPathway         | BioCarta       | TPO Signaling Pathway                      | 22       | 3.059   | 0.00124 | 0.114 | 0.43454 |
| hsa05320           | KEGG           | Autoimmune thyroid disease                 | 50       | 2.937   | 0.00426 | 0.143 | 0.55819 |
| hsa04630           | KEGG           | Jak-STAT signaling pathway                 | 146      | 2.881   | 0.00434 | 0.149 | 0.61815 |
| hsa05330           | KEGG           | Allograft rejection                        | 35       | 2.876   | 0.00345 | 0.134 | 0.62273 |
| hsa04940           | KEGG           | Type I diabetes mellitus                   | 41       | 2.78    | 0.00422 | 0.16  | 0.72197 |
| GO0016050          | GO             | vesicle organization and biogenesis        | 36       | 2.695   | 0.00478 | 0.187 | 0.79916 |
| GO0006691          | GO             | leukotriene metabolic process              | 21       | 2.575   | 0.00594 | 0.241 | 0.89036 |

**Table S2.** Test statistic for genes in the IL12/IL23 pathway in four GWAS data sets. For each gene, the top SNP, the test statistic (as chi2 values) and the P-value are shown. These values were also drawn in **Figure 1** in the main text for visual comparison of studies.

| Gene           | Locus    | WTCCC      |        |          | Ped-IBD    |       |          | CDCC       |        |          | CHOP-CD-AA |       |          |
|----------------|----------|------------|--------|----------|------------|-------|----------|------------|--------|----------|------------|-------|----------|
|                |          | Top SNP    | Chi2   | P        | Top SNP    | Chi2  | P        | Top SNP    | Chi2   | P        | Top SNP    | Chi2  | P        |
| <i>IL12RB2</i> | 1p31.1   | rs7546245  | 38.27  | 6.17E-10 | rs1495965  | 15.01 | 0.000107 | rs1495965  | 25.13  | 5.36E-07 | rs3790565  | 8.037 | 0.004583 |
| <i>IL12B</i>   | 5q33.3   | rs1363670  | 20.22  | 6.89E-06 | rs6556412  | 10.59 | 0.00114  | rs10045431 | 24.91  | 6.02E-07 | rs1422878  | 6.234 | 0.01253  |
| <i>IL12RB1</i> | 19p13.11 | rs374326   | 8.231  | 0.004117 | rs12973060 | 2.25  | 0.1331   | rs4808739  | 4.564  | 0.03264  | rs375947   | 13.47 | 0.000242 |
| <i>CD3D</i>    | 11q23.3  | rs2276424  | 7.701  | 0.005519 | rs2276424  | 1.162 | 0.2811   | rs2276424  | 0.506  | 0.4769   | rs2276424  | 6.284 | 0.01218  |
| <i>CD3G</i>    | 11q23.3  | rs2276424  | 7.701  | 0.005519 | rs4938507  | 2.818 | 0.09324  | rs17613576 | 1.447  | 0.229    | rs2276424  | 6.284 | 0.01218  |
| <i>CD247</i>   | 1q24.2   | rs12061855 | 7.609  | 0.005806 | rs1799704  | 5.147 | 0.02328  | rs2988276  | 10.67  | 0.001088 | rs870875   | 5.088 | 0.02409  |
| <i>JUN</i>     | 1p32.1   | rs2760484  | 7.555  | 0.005985 | rs942123   | 11.36 | 0.000748 | rs11207303 | 6.772  | 0.009258 | rs6679571  | 4.416 | 0.03561  |
| <i>CD3E</i>    | 11q23.3  | rs4938499  | 7.52   | 0.0061   | rs7937334  | 1.709 | 0.1911   | rs2277289  | 0.8178 | 0.3658   | rs12577841 | 5.579 | 0.01818  |
| <i>IL18R1</i>  | 2q12.1   | rs1035127  | 6.949  | 0.008388 | rs13015714 | 11.89 | 0.000566 | rs1035130  | 13.52  | 0.000237 | rs11465597 | 2.011 | 0.1562   |
| <i>JAK2</i>    | 9p24.1   | rs7032169  | 6.368  | 0.01162  | rs10974873 | 6.224 | 0.0126   | rs10758669 | 17.74  | 2.54E-05 | rs10815149 | 7.94  | 0.004834 |
| <i>CCR5</i>    | 3p21.31  | rs3918357  | 4.926  | 0.02645  | NA         | NA    | NA       | NA         | NA     | NA       | NA         | NA    | NA       |
| <i>MAPK14</i>  | 6p21.31  | rs2237093  | 3.985  | 0.04591  | rs2237094  | 2.386 | 0.1224   | rs7757672  | 1.991  | 0.1582   | rs7757672  | 7.296 | 0.006911 |
| <i>IL18</i>    | 11q23.1  | rs544354   | 3.158  | 0.07555  | rs243908   | 1.47  | 0.2254   | rs10891323 | 3.463  | 0.06275  | rs10891323 | 2.269 | 0.132    |
| <i>IFNG</i>    | 12q15    | rs10492200 | 2.355  | 0.1249   | rs12312186 | 10.6  | 0.001132 | rs7967588  | 9.025  | 0.002664 | rs12312186 | 5.147 | 0.02329  |
| <i>MAP2K6</i>  | 17q24.3  | rs10512573 | 2.244  | 0.1341   | rs2716191  | 4.14  | 0.04189  | rs11867183 | 6.252  | 0.01241  | rs1121381  | 5.811 | 0.01593  |
| <i>STAT4</i>   | 2q32.3   | rs897200   | 2.22   | 0.1362   | rs16833215 | 6.27  | 0.01228  | rs2356352  | 4.354  | 0.03693  | rs7574865  | 3.758 | 0.05255  |
| <i>IL12A</i>   | 3q25.33  | rs7643177  | 1.778  | 0.1824   | rs10936194 | 3.829 | 0.05037  | rs2561287  | 6.391  | 0.01147  | rs7636840  | 3.074 | 0.07955  |
| <i>TYK2</i>    | 19p13.2  | rs3176768  | 1.378  | 0.2405   | rs12720356 | 16.09 | 6.03E-05 | rs281414   | 19.67  | 9.22E-06 | rs280502   | 1.441 | 0.23     |
| <i>ETV5</i>    | 3q27.2   | rs1516728  | 0.9608 | 0.327    | rs9867846  | 3.659 | 0.05576  | rs6777779  | 2.191  | 0.1388   | rs9820527  | 2.889 | 0.08917  |
| <i>MAPK8</i>   | 10q11.22 | rs17698002 | 0.4149 | 0.5195   | rs1062225  | 4.405 | 0.03583  | rs10857561 | 3.282  | 0.07003  | rs11596599 | 5.121 | 0.02364  |

**Table S3.** Results from Barrett *et al* meta-analysis on CD for genes in the IL12/IL23 pathway.

| Gene           | Locus    | SNP        | Risk Allele | Non-risk Allele | Meta-Z   | Meta-P   |
|----------------|----------|------------|-------------|-----------------|----------|----------|
| <i>IL12RB2</i> | 1p31.1   | rs7546245  | C           | T               | 8.45276  | 2.84E-17 |
| <i>IL12B</i>   | 5q33.3   | rs10045431 | C           | A               | 5.752226 | 8.81E-09 |
| <i>IL12RB1</i> | 19p13.11 | rs374326   | C           | T               | 3.362568 | 0.000772 |
| <i>CD3D</i>    | 11q23.3  | rs3212262  | G           | T               | 1.942595 | 0.052065 |
| <i>CD3G</i>    | 11q23.3  | rs3212262  | G           | T               | 1.942595 | 0.052065 |
| <i>CD247</i>   | 1q24.2   | rs704853   | G           | T               | 2.566147 | 0.010284 |
| <i>JUN</i>     | 1p32.1   | rs6661505  | C           | T               | 3.545194 | 0.000392 |
| <i>CD3E</i>    | 11q23.3  | rs7937334  | C           | T               | 1.647788 | 0.099396 |
| <i>IL18R1</i>  | 2q12.1   | rs1035127  | A           | G               | 3.840931 | 0.000123 |
| <i>JAK2</i>    | 9p24.1   | rs10758669 | C           | A               | 4.966956 | 6.80E-07 |
| <i>CCR5</i>    | 3p21.31  |            |             |                 |          |          |
| <i>MAPK14</i>  | 6p21.31  | rs2237093  | C           | T               | 1.266613 | 0.205294 |
| <i>IL18</i>    | 11q23.1  | rs11214108 | A           | G               | 2.46519  | 0.013694 |
| <i>IFNG</i>    | 12q15    | rs10878698 | G           | A               | 2.39998  | 0.016396 |
| <i>MAP2K6</i>  | 17q24.3  | rs2905443  | C           | T               | 2.400609 | 0.016368 |
| <i>STAT4</i>   | 2q32.3   | rs1584945  | C           | T               | 2.078147 | 0.037696 |
| <i>IL12A</i>   | 3q25.33  | rs6800657  | G           | A               | 2.012755 | 0.04414  |
| <i>TYK2</i>    | 19p13.2  | rs12720356 | C           | A               | 2.763306 | 0.005722 |
| <i>ETV5</i>    | 3q27.2   | rs9867846  | A           | G               | 2.231897 | 0.025622 |
| <i>MAPK8</i>   | 10q11.22 | rs17697885 | C           | T               | 1.870675 | 0.06139  |
